# Supplementary material for: Anxiety, Depression and Quality of Life—A Systematic Review of Evidence from Longitudinal Observational Studies
Source: MDPI journal article supplement (doi:10.3390/ijerph182212022), 2021-11-16
Supplement: s1 [file s1]

Appendix. Descriptive table and forest plots for meta-analyses of SF MCS and PCS scores

Table S1. Detailed descriptive information for included studies (N = 47)

| First author (year)  | Title of the paper                                                                        | Country     | Sample description; recruitment setting                                                                                                                                                                          | Sample characteristics at BL                                         |                       |                  | Assessment of anxiety/depression and prevalence percentage /mean (SD) scores at BL      | Assessment of QoL and mean (SD) scores at BL                                                                                                                                                                                                                                                                                                                                                                                                                   | Length of follow-up(s)        | Quality assessment rating |
|----------------------|-------------------------------------------------------------------------------------------|-------------|------------------------------------------------------------------------------------------------------------------------------------------------------------------------------------------------------------------|----------------------------------------------------------------------|-----------------------|------------------|-----------------------------------------------------------------------------------------|----------------------------------------------------------------------------------------------------------------------------------------------------------------------------------------------------------------------------------------------------------------------------------------------------------------------------------------------------------------------------------------------------------------------------------------------------------------|-------------------------------|---------------------------|
|                      |                                                                                           |             |                                                                                                                                                                                                                  | N                                                                    | Age: mean (SD), range | % Female         |                                                                                         |                                                                                                                                                                                                                                                                                                                                                                                                                                                                |                               |                           |
| Ardal (2013)         | Health-related quality of life in recurrent depressive disorder-a 10-year follow-up study | Norway      | Prospective study of patients with recurrent MD and who were in recovery at FU, recruited from psychiatric clinics and institutions, and matched healthy control group; Other (health care and healthy controls) | N <sub>analytical</sub> sample = 28 (14 MD patients and 14 controls) | 50.3 (9.7)            | Not reported     | DSM-IV criteria for recurrent MD, HDRS<br><br>HDRS scores in MD-group at BL: 21.6 (3.6) | SF-36<br><br>SF-36 scores at B <ul style="list-style-type: none"> <li>Physical functioning: 78.3 (22.3)</li> <li>Physical role: 54.5 (48.6)</li> <li>Pain: 70.9 (28.9)</li> <li>General health: 64.2 (28.8)</li> <li>Vitality: 40.7 (26.0)</li> <li>Social functioning: 61.0 (40.7)</li> <li>Emotional role: 52.4 (46.8)</li> <li>Psychological health: 56.2 (29.9)</li> <li>PCS: 61.7 (26.7)</li> <li>MCS: 54.8 (31.9)</li> <li>Total: 59.8 (29.9)</li> </ul> | 10 years (1 FU)               | Poor                      |
| Buist-Bouwman (2004) | Functioning after a major depressive                                                      | Netherlands | Prospective study of adults from the Dutch general                                                                                                                                                               | N <sub>BL</sub> = 7,076; N <sub>FU</sub> =                           | Total: 41.4,          | Total: 51.7, MDE | CIDI (DSM-III-R) for MDE                                                                | SF-36                                                                                                                                                                                                                                                                                                                                                                                                                                                          | 3 years (2 FUs, one at 1 year | Good                      |

# Appendix. Descriptive table and forest plots for meta-analyses of SF MCS and PCS scores

|                                                    |                                                                                                                |                                                  |                                                       |                      |                                                                      |                                                                                                                                                                                                                                                                                                                                                                                                                                                                                                                                                                                                                                                                                                                                                      |                                    |
|----------------------------------------------------|----------------------------------------------------------------------------------------------------------------|--------------------------------------------------|-------------------------------------------------------|----------------------|----------------------------------------------------------------------|------------------------------------------------------------------------------------------------------------------------------------------------------------------------------------------------------------------------------------------------------------------------------------------------------------------------------------------------------------------------------------------------------------------------------------------------------------------------------------------------------------------------------------------------------------------------------------------------------------------------------------------------------------------------------------------------------------------------------------------------------|------------------------------------|
| episode:<br>complete or<br>incomplete<br>recovery? | population<br>(NEMESIS),<br>Subgroup of<br>adults who<br>recovered from a<br>new MDE;<br>General<br>population | 4,796;<br>N <sub>MDE</sub><br>subsample =<br>165 | MDE<br>subsample:<br>e: 38.7,<br>NEMESIS:<br>S: 18-64 | subsample:<br>e: 69% | Incidence and<br>remission of MDE-<br>group in total<br>sample: 3.8% | <p>SF-36 scores at BL<br/>for total sample</p> <ul style="list-style-type: none"> <li>• physical functioning: 92.4 (20.4)</li> <li>• physical role: 86.9 (28.8)</li> <li>• vitality: 73.0 (17.1)</li> <li>• pain: 85.9 (20.7)</li> <li>• psychological health: 83.5 (13.0)</li> <li>• psychological role: 94.6 (19.3)</li> <li>• social functioning: 91.0 (19.3)</li> <li>• general health: 75.2 (16.9)</li> </ul> <p>SF-36 scores at BL<br/>for MDE subsample</p> <ul style="list-style-type: none"> <li>• physical functioning: 88.0 (17.0)</li> <li>• physical role: 78.2 (35.2)</li> <li>• vitality: 63.3 (18.1)</li> <li>• pain: 80.1 (23.5)</li> <li>• psychological health: 73.9 (16.5)</li> <li>• psychological role: 85.7 (30.4)</li> </ul> | and one at<br>3 years<br>after BL) |
|----------------------------------------------------|----------------------------------------------------------------------------------------------------------------|--------------------------------------------------|-------------------------------------------------------|----------------------|----------------------------------------------------------------------|------------------------------------------------------------------------------------------------------------------------------------------------------------------------------------------------------------------------------------------------------------------------------------------------------------------------------------------------------------------------------------------------------------------------------------------------------------------------------------------------------------------------------------------------------------------------------------------------------------------------------------------------------------------------------------------------------------------------------------------------------|------------------------------------|

# Appendix. Descriptive table and forest plots for meta-analyses of SF MCS and PCS scores

|                |                                                                                                                                                                   |                          |                                                                                                                                                                 |                                                                                      |                                |                |                                                                                                                                                                                                 |                                                                                                                                                                                                                                                                                                                                                                                              |                                                         |      |
|----------------|-------------------------------------------------------------------------------------------------------------------------------------------------------------------|--------------------------|-----------------------------------------------------------------------------------------------------------------------------------------------------------------|--------------------------------------------------------------------------------------|--------------------------------|----------------|-------------------------------------------------------------------------------------------------------------------------------------------------------------------------------------------------|----------------------------------------------------------------------------------------------------------------------------------------------------------------------------------------------------------------------------------------------------------------------------------------------------------------------------------------------------------------------------------------------|---------------------------------------------------------|------|
|                |                                                                                                                                                                   |                          |                                                                                                                                                                 |                                                                                      |                                |                |                                                                                                                                                                                                 | <ul style="list-style-type: none"> <li>• social functioning: 82.8 (19.7)</li> <li>• general health: 68.3 (18.9)</li> </ul>                                                                                                                                                                                                                                                                   |                                                         |      |
| Cabello (2014) | Risk factors for incidence and persistence of disability in chronic major depression and alcohol use disorders: longitudinal analyses of a population-based study | United States of America | Representative sample of non-institutionalized U.S. general population aged 18 years and older (NESARC), Subgroup of adults with chronic MD; General population | $N_{BL} = 43,093$ ;<br>$N_{FU} = 34,653$ ;<br>$N_{\text{chronic MD subgroup}} = 272$ | NESARC : 46.0 (17.4);<br>18-98 | NESARC : 58.0% | AUDADIS interview (DSM-IV) for MD and severity of MD symptoms<br><br>Chronic MD in sample: 0.008%                                                                                               | SF-12<br><br>SF-12 scores for NESARC <ul style="list-style-type: none"> <li>• physical functioning: 34.5 (10.1)</li> <li>• physical role: 50.9 (10.3)</li> <li>• vitality: 53.9 (10.8)</li> <li>• pain: 49.9 (12.2)</li> <li>• mental health: 51.9 (10.5)</li> <li>• emotional role: 50.7 (10.2)</li> <li>• social functioning: 51.7 (9.9)</li> <li>• general health: 50.1 (12.2)</li> </ul> | 3 years (1 FU)                                          | Good |
| Cerne (2013)   | Quality of life in patients with depression, panic syndrome, other anxiety syndrome, alcoholism and chronic somatic diseases: a longitudinal                      | Slovenia                 | Adult patients recruited in family practices regardless of their reason for visit; Health care                                                                  | $N_{BL} = 1,121$ ;<br>$N_{FU2} = 714$ ;<br>$N_{\text{analytical sample}} = 516$      | 48.0 (14.6);<br>18-75          | 62.8%          | CIDI for depression (DSM-IV criteria), PHQ modules for panic syndrome and other anxiety syndromes<br><br>Disorders at BL: <ul style="list-style-type: none"> <li>• Depression: 15.3%</li> </ul> | SF-12<br><br>SF-12 scores for analytical sample <ul style="list-style-type: none"> <li>• MCS: 51.6 (8.2)</li> <li>• PCS: 44.9 (9.0)</li> </ul>                                                                                                                                                                                                                                               | 2 years (2 FUs, one at 6 and one at 24 months after BL) | Fair |

# Appendix. Descriptive table and forest plots for meta-analyses of SF MCS and PCS scores

|              |                                                                                                                             |                 |                                                                                    |                                                                                                                   |                                                        |                                      |                                                                                                                                                             |                                                                                                                                                                                                                                                                              |                                                     |      |
|--------------|-----------------------------------------------------------------------------------------------------------------------------|-----------------|------------------------------------------------------------------------------------|-------------------------------------------------------------------------------------------------------------------|--------------------------------------------------------|--------------------------------------|-------------------------------------------------------------------------------------------------------------------------------------------------------------|------------------------------------------------------------------------------------------------------------------------------------------------------------------------------------------------------------------------------------------------------------------------------|-----------------------------------------------------|------|
|              | study in Slovenian primary care patients                                                                                    |                 |                                                                                    |                                                                                                                   |                                                        |                                      | <ul style="list-style-type: none"> <li>• Panic syndrome: 6.4%</li> <li>• Other anxiety syndrome: 2.5%</li> </ul>                                            |                                                                                                                                                                                                                                                                              |                                                     |      |
| Chin (2015)  | 12-Month naturalistic outcomes of depressive disorders in Hong Kong's primary care                                          | China/Hong Kong | Adults recruited in primary care who screened positive for depression; Health care | $N_{BL} = 10,179$ ; $N_{FU \text{ cohort}} = 4,358$ ; $N_{FU3} = 3,505$ ; $N_{depression \text{ subgroup}} = 539$ | 49.0 (17.1); depression n subgroup: 46.9 (17.4); 18-94 | 56.6%; depression n subgroup : 68.9% | PHQ-9, CES-D-20<br><br>Depression screened positive at BL among FU cohort: 12.4%                                                                            | SF-12v2<br><br>SF-12v2 scores for depression subgroup at BL <ul style="list-style-type: none"> <li>• PCS: 42.7 (11.9)</li> <li>• MCS: 37.8 (12.6)</li> </ul>                                                                                                                 | 1 year (3 FUs; one at 3, 6, and 12 months after BL) | Fair |
| Chou (2011)  | Interaction between pre- and post-migration factors on depressive symptoms in new migrants to Hong Kong from Mainland China | China/Hong Kong | Adults newly migrating to Hong Kong from mainland China; Other (migration sample)  | $N_{BL} = 449$ ; $N_{FU} = 347$                                                                                   | 34.1 (8.7), 18-67                                      | 87.3%                                | CES-D-20<br><br>CES-D-20 at BL: 11.4 (10.0)                                                                                                                 | WHOQOL-Bref<br><br>WHOQOL-Bref at BL: 99.3 (13.3)                                                                                                                                                                                                                            | 1 year (1 FU)                                       | Good |
| Chung (2012) | Quality of life in major depressive disorder: the role of pain and pain catastrophizing cognition                           | China           | Adult outpatients or inpatients with new or first MDD episode; Health care         | $N_{BL} = 91$ ; $N_{FU} = 82$                                                                                     | 48.3 (9.5), 20-62                                      | 80.2%                                | DSM-IV, HADS, HRSD <sub>17</sub><br><br>HADS-anxiety at BL: 11.8 (4.3)<br><br>HADS-depression at BL: 11.6 (4.5)<br><br>HRSD <sub>17</sub> at BL: 24.3 (4.8) | SF-36<br><br>SF-36 at BL <ul style="list-style-type: none"> <li>• physical: 72.7 (18.7)</li> <li>• physical-role: 20.7 (32.6)</li> <li>• pain: 38.2 (24.3)</li> <li>• general health: 28.2 (20.0)</li> <li>• vitality: 29.3 (19.1)</li> <li>• social: 38.7 (28.3)</li> </ul> | 3 months (1 FU)                                     | Fair |

Appendix. Descriptive table and forest plots for meta-analyses of SF MCS and PCS scores

|                         |                                                                                                                    |                                                                                     |                                                                                                               |                                                |                    |       |                                                   |                                                                                                                                                                                                                                                                                                                                                                |                                                                   |      |
|-------------------------|--------------------------------------------------------------------------------------------------------------------|-------------------------------------------------------------------------------------|---------------------------------------------------------------------------------------------------------------|------------------------------------------------|--------------------|-------|---------------------------------------------------|----------------------------------------------------------------------------------------------------------------------------------------------------------------------------------------------------------------------------------------------------------------------------------------------------------------------------------------------------------------|-------------------------------------------------------------------|------|
|                         |                                                                                                                    |                                                                                     |                                                                                                               |                                                |                    |       |                                                   | <ul style="list-style-type: none"> <li>emotional: 13.8 (27.7)</li> <li>mental health: 35.3 (18.9)</li> <li>PCS: 33.4 (10.8)</li> <li>MCS: 25.1 (11.3)</li> </ul>                                                                                                                                                                                               |                                                                   |      |
| De Almeida Fleck (2005) | Major depression and its correlates in primary care settings in six countries. 9-month follow-up study             | Cross-national (Australia, Brazil, Israel, Spain, Russia, United States of America) | Prospective study of adult primary care patients with new and/or untreated MD at BL (LIDO study); Health care | N <sub>analytical</sub> sample = 968           | 40.8 (14.6), 18-75 | 71.3% | CES-D-20, CIDI<br><br>CES-D-20 at BL: 29.1 (10.6) | QLDS, WHOQOL-Bref, SF-12<br><br>QLDS at BL: 12.0 (7.6)<br><br>WHOQOL-Bref at BL <ul style="list-style-type: none"> <li>physical: 12.1 (2.8)</li> <li>psychological: 11.4 (2.6)</li> <li>social: 11.9 (3.3)</li> <li>environment: 12.3 (2.4)</li> </ul> SF-12 at BL <ul style="list-style-type: none"> <li>PCS: 41.7 (11.3)</li> <li>MCS: 34.0 (9.8)</li> </ul> | 9 months (1 FU)                                                   | Fair |
| Diehr (2006)            | Synchrony of change in depressive symptoms, health status, and quality of life in persons with clinical depression | Cross-national (Australia, Brazil, Israel, Spain, Russia, United States of America) | Prospective study of adult primary care patients with untreated MD at BL (LIDO study); Health care            | N <sub>BL</sub> = 1,180; N <sub>FU</sub> = 982 | 40.8 (14.6), 17-76 | 71.0% | CES-D, CIDI<br><br>CES-D at BL: 29.0              | SF-12, QLDS, WHOQOL-Bref<br><br>SF-12 at BL <ul style="list-style-type: none"> <li>MCS : 34.1</li> <li>PCS: 42.0</li> </ul> QLDS at BL: 11.9<br><br>WHOQOL-Bref at BL: <ul style="list-style-type: none"> <li>Environment: 12.3</li> </ul>                                                                                                                     | 9 months (3 FUs, one at 6 weeks, 3 months, and 9 months after BL) | Fair |

# Appendix. Descriptive table and forest plots for meta-analyses of SF MCS and PCS scores

|               |                                                                                                          |                          |                                                                                                                                                  |                                                                                          |                 |       |                                                                                              |                                                                                                                                      |                                                        |      |
|---------------|----------------------------------------------------------------------------------------------------------|--------------------------|--------------------------------------------------------------------------------------------------------------------------------------------------|------------------------------------------------------------------------------------------|-----------------|-------|----------------------------------------------------------------------------------------------|--------------------------------------------------------------------------------------------------------------------------------------|--------------------------------------------------------|------|
|               |                                                                                                          |                          |                                                                                                                                                  |                                                                                          |                 |       |                                                                                              | <ul style="list-style-type: none"><li>physical: 12.2</li><li>psychological: 11.4</li><li>social: 12.0</li><li>social: 12.0</li></ul> |                                                        |      |
| Hajek (2015)  | Complex coevolution of depression and health-related quality of life in old age                          | Germany                  | Older adults from a representative, population-based cohort recruited in primary care (AgeCoDe study); Health care                               | N <sub>BL</sub> = 3,287; N <sub>analytical sample</sub> = 2,696                          | 82.6 (3.4), 75+ | 66.0% | GDS<br><br>GDS at BL: 2.5 (2.5)                                                              | EQ-VAS<br><br>EQ-VAS at BL: 65.4 (17.9)                                                                                              | 6 years (4 FUs, each 18 months apart)                  | Good |
| Hasche (2010) | Quality of Life Outcomes for Depressed and Non-Depressed Older Adults in Community Long Term Care        | United States of America | Older adults recruited as new clients of a community long-term care program; Health care                                                         | N <sub>BL</sub> = 615; N <sub>analytical sample</sub> = 551                              | 72.4 (7.9); 60+ | 77.1% | DIS, CES-D<br><br>Depression at BL according to screener: 25.6%                              | SF-8<br><br>SF-8 at BL <ul style="list-style-type: none"><li>PCS-8: 33.2 (11.1)</li><li>MCS-8: 36.3 (20.3)</li></ul>                 | 1 year (2 FUs, one at 6 and one at 12 months after BL) | Fair |
| Heo (2008)    | A prospective study on changes in health status following flood disaster                                 | Korea                    | Community-recruited sample from agricultural population experiencing flood disaster; Other (agricultural population experiencing flood disaster) | N <sub>BL</sub> = 83; N <sub>FU</sub> = 67; N <sub>analytical sample</sub> = 58          | 53.6 (14.6)     | 51.7% | BDI<br><br>Descriptive information for BL BDI not available (only included at FU assessment) | SF-36-K<br><br>SF-36-K total score at BL: 59.6 (19.8)                                                                                | 1.5 years (1 FU)                                       | Fair |
| Ho (2014)     | Coexisting medical comorbidity and depression: multiplicative effects on health outcomes in older adults | Singapore                | Older adults recruited from the community (SLAS); General population                                                                             | N <sub>BL</sub> = 2,805; N <sub>FU</sub> = 1,850; N <sub>analytical sample</sub> = 1,788 | 66.0 (7.4), 55+ | 65.3% | GDS<br><br>Depression at BL: 11.4%<br><br>GDS at BL: 1.8 (2.6)                               | SF-12<br><br>SF-12 at BL <ul style="list-style-type: none"><li>PCS: 48.6 (7.2)</li><li>MCS: 54.2 (7.9)</li></ul>                     | 2 years (1 FU)                                         | Fair |

# Appendix. Descriptive table and forest plots for meta-analyses of SF MCS and PCS scores

|                |                                                                                                                                                     |                          |                                                                                                                                                    |                                                                                           |             |       |                                                                                                                                                                                                               |                                                                                                                                                                                                    |                                |      |
|----------------|-----------------------------------------------------------------------------------------------------------------------------------------------------|--------------------------|----------------------------------------------------------------------------------------------------------------------------------------------------|-------------------------------------------------------------------------------------------|-------------|-------|---------------------------------------------------------------------------------------------------------------------------------------------------------------------------------------------------------------|----------------------------------------------------------------------------------------------------------------------------------------------------------------------------------------------------|--------------------------------|------|
| Hoertel (2017) | A comprehensive model of predictors of persistence and recurrence in adults with major depression: Results from a national 3-year prospective study | United States of America | Representative sample of civilian, noninstitutionalized, adult US population (NESARC), respondents with MDE in past year at BL; General population | N <sub>FU</sub> = 34,653; N <sub>analytical sample with past-year MDE at BL</sub> = 2,587 | 39.5 (1.0)  | 66.6% | DSM-IV, AUDADIS-IV<br><br>Past-year MDE at BL: 7.5%                                                                                                                                                           | SF-12v2<br><br>SF-12v2<br><ul style="list-style-type: none"> <li>PCS: 47.9 (1.5)</li> <li>MCS: 43.6 (2.7)</li> </ul>                                                                               | 3 years (1 FU)                 | Good |
| Hussain (2016) | The relationship between psychiatric morbidity and quality of life: interview study of Norwegian tsunami survivors 2 and 6 years post-disaster      | Norway                   | Sample of adult Norwegian tourists who have survived a Tsunami; Other (tourists who survived a tsunami)                                            | N <sub>BL</sub> = 62; N <sub>FU</sub> = 58                                                | 40.6 (11.3) | 46.8% | SCID, MINI<br><br>Disorders at BL: <ul style="list-style-type: none"> <li>PTSD: 11.3%</li> <li>Specific phobia: 29.0%</li> <li>Other anxiety disorders: 27.4%</li> <li>Depressive disorders: 22.6%</li> </ul> | WHOQOL-Bref (full questionnaire at BL, reduced number of items at FU)<br><br>WHOQOL-Bref at BL: <ul style="list-style-type: none"> <li>general QoL: 4.0 (0.9)</li> <li>hrqol: 3.6 (1.2)</li> </ul> | 4 years (1 FU)                 | Poor |
| Joffe (2012)   | Lifetime history of depression and anxiety disorders as a predictor of quality of life in midlife women in the absence of current illness episodes  | United States of America | Midlife women without current mental illness episode (SWAN study); General population                                                              | N <sub>BL</sub> = 443; N <sub>analytical sample</sub> = 425                               | 45.6 (2.5)  | 100%  | SCID<br><br>Lifetime history of disorder at FU: <ul style="list-style-type: none"> <li>anxiety or depression: 51.8%</li> <li>depression only: 38.1%</li> <li>anxiety only: 4.9%</li> <li>comorbid</li> </ul>  | SF-36<br><br>SF-36 at BL not reported                                                                                                                                                              | 6 years (6 FUs, one each year) | Fair |

# Appendix. Descriptive table and forest plots for meta-analyses of SF MCS and PCS scores

|                 |                                                                                                                                                                  |                          |                                                                                                                                                                                                  |                                                            |                  |     |                                                                                                                                                                                                  |                                                                                                                                                                                                                                                                                                                 |                                                  |      |  |
|-----------------|------------------------------------------------------------------------------------------------------------------------------------------------------------------|--------------------------|--------------------------------------------------------------------------------------------------------------------------------------------------------------------------------------------------|------------------------------------------------------------|------------------|-----|--------------------------------------------------------------------------------------------------------------------------------------------------------------------------------------------------|-----------------------------------------------------------------------------------------------------------------------------------------------------------------------------------------------------------------------------------------------------------------------------------------------------------------|--------------------------------------------------|------|--|
|                 |                                                                                                                                                                  |                          |                                                                                                                                                                                                  |                                                            |                  |     |                                                                                                                                                                                                  | depression and anxiety: 22.8%                                                                                                                                                                                                                                                                                   |                                                  |      |  |
| Johansen (2007) | The predictive value of post-traumatic stress disorder symptoms for quality of life: a longitudinal study of physically injured victims of non-domestic violence | Norway                   | Non-domestic violence victims who had sought assistance from emergency department or filed a police report; Several settings: health care and non-domestic violence victims filing police report | N <sub>BL</sub> = 173; N <sub>analytical sample</sub> = 70 | 33 (12.3), 18-75 | 17% | IES-15<br><br>IES-15 at BL: <ul style="list-style-type: none"><li>• Total: 26.0 (18.4)</li><li>• Intrusion : 13.6 (10.1)</li><li>• Avoidance: 12.3 (10.5)</li></ul>                              | WHOQOL-Bref<br><br>WHOQOL-Bref at BL: <ul style="list-style-type: none"><li>• Physical health: 14.9 (3.6)</li><li>• Psychological: 13.9 (3.1)</li><li>• Social: 14.7 (3.2)</li><li>• Environmental: 14.5 (2.7)</li><li>• Overall health: 3.6 (1.0)</li><li>• Overall QoL: 3.4 (1.1)</li></ul>                   | 12 months (2 FUs)                                | Fair |  |
| Kramer (2003)   | Service utilization and outcomes in medically ill veterans with posttraumatic stress and depressive disorders                                                    | United States of America | Male veterans hospitalized for somatic illnesses with and without mental disorders; Health care                                                                                                  | N <sub>BL</sub> = 743; N <sub>FU2</sub> = 582              | 18+              | 0%  | Q-DIS, SCL-90<br><br>Current or lifetime disorders at BL: <ul style="list-style-type: none"><li>• depression: 4.8%</li><li>• PTSD: 6.2%</li><li>• comorbid depression &amp; PTSD: 6.2%</li></ul> | SF-36<br><br>SF-36 adjusted means <ul style="list-style-type: none"><li>• physical: 45.1 (3.9)</li><li>• physical-role: 31.4 (5.8)</li><li>• pain: 50.3 (6.3)</li><li>• general health: 46.6 (4.9)</li><li>• energy/fatigue: 42.0 (6.1)</li><li>• social: 64.4 (6.3)</li><li>• emotional: 75.2 (13.1)</li></ul> | 1 year (2 FUs, one at 3, and 12 months after BL) | Fair |  |



## Appendix. Descriptive table and forest plots for meta-analyses of SF MCS and PCS scores

| <div> <div></div> <div>• mental health: 73.6 (8.6)</div> </div> |                                                                                                                        |                          |                                                                                                                                                                       |                                                                                                                                                    |                    |       |                                                                                                                                                                                                                                        |                                                         |                                                                                                               |      |
|-----------------------------------------------------------------|------------------------------------------------------------------------------------------------------------------------|--------------------------|-----------------------------------------------------------------------------------------------------------------------------------------------------------------------|----------------------------------------------------------------------------------------------------------------------------------------------------|--------------------|-------|----------------------------------------------------------------------------------------------------------------------------------------------------------------------------------------------------------------------------------------|---------------------------------------------------------|---------------------------------------------------------------------------------------------------------------|------|
| Kuehner (2009)                                                  | Subjective quality of life aspects predict depressive symptoms over time: results from a three-wave longitudinal study | Germany                  | Formerly depressed inpatients, recruited at discharge from psychiatric hospital and matched community controls; several settings (health care and general population) | N <sub>BL</sub> = 182; N <sub>analytical sample</sub> = 158 (among those n = 82 depressed patients; n = 76 community controls with follow-up data) | 45.0 (12.4), 18-70 | 49.4% | ICD-10 diagnosis (F32, F33, F34.1) at hospital stay; SCID for MD (DSM-IV), MADRS<br><br>In depression subgroup: 78% fully remitted, 11% partly remitted, 11% non-remitted at BL<br><br>In community group: 2.6% minor depression at BL | WHOQOL-Bref<br><br>WHOQOL-Bref at BL not reported       | 3.5 years (2 FUs, one at 5, and 41 months after BL; BL assessment was one month after hospital discharge)     | Fair |
| Kuehner (2012)                                                  | Response styles to depressed mood affect the long-term course of psychosocial functioning in depressed patients        | Germany                  | Formerly depressed inpatients, recruited at discharge from psychiatric hospital; Health care                                                                          | N <sub>BL</sub> = 91; N <sub>analytical sample</sub> = 71                                                                                          | 45.1 (12.7), 19-70 | 53.5% | ICD-10 diagnosis at hospital stay; SCID for MD, FDD-DSM-IV, MADRS<br><br>At BL: 19.7% with first MDE, 58.5% with at least third MDE                                                                                                    | WHOQOL-Bref<br><br>WHOQOL-Bref at BL not reported       | 5.5 years (3 FUs, one at 5, 41, and 65 months after BL; BL assessment was one month after hospital discharge) | Fair |
| Lenert (2000)                                                   | Estimation of utilities for the effects of depression from the SF-12                                                   | United States of America | Primary care sample of patients with current MDD or dysthymia (Course of Depression study); Health care                                                               | N <sub>BL</sub> = 395; N <sub>FU</sub> = 295; N <sub>analytical sample</sub> = 241                                                                 | 43.7               | 73%   | DSM-III diagnosis (DIS)<br><br>MDD: 40%                                                                                                                                                                                                | SF-12<br><br>SF-12 at BL:<br>• PCS: 44.5<br>• MCS: 39.0 | 2 years (2 FUs)                                                                                               | Fair |
| Mars (2015)                                                     | Longitudinal symptom course in adults with                                                                             | Wales                    | Recurrently depressed parents (Early Prediction of Adolescent                                                                                                         | N <sub>BL</sub> = 337; N <sub>analytical</sub>                                                                                                     | 42.2 (5.4)         | 91.8% | SCAN interview and clinical review by psychiatrist                                                                                                                                                                                     | EQ-5D-3L (without anxiety/depression item)              | Mean time between assessments: BL-                                                                            | Fair |

# Appendix. Descriptive table and forest plots for meta-analyses of SF MCS and PCS scores

|                 |                                                                                                                                              |                                                                                                                               |                                                                                                                                                                 |                                                                                           |            |              |                                                                                                                                                                                                                         |                                                                                                                                                                                                               |                                                        |      |
|-----------------|----------------------------------------------------------------------------------------------------------------------------------------------|-------------------------------------------------------------------------------------------------------------------------------|-----------------------------------------------------------------------------------------------------------------------------------------------------------------|-------------------------------------------------------------------------------------------|------------|--------------|-------------------------------------------------------------------------------------------------------------------------------------------------------------------------------------------------------------------------|---------------------------------------------------------------------------------------------------------------------------------------------------------------------------------------------------------------|--------------------------------------------------------|------|
|                 | recurrent depression: Impact on impairment and risk of psychopathology in offspring                                                          |                                                                                                                               | Depression study); several settings (primary care, previous sample, community)                                                                                  | sample = 233                                                                              |            |              | MDD at BL: 22.4%                                                                                                                                                                                                        | EQ-5D-3L at BL not reported                                                                                                                                                                                   | FU1: 16.2 months, FU1-FU2: 12.5 months (2 FUs)         |      |
| Moutinho (2019) | Mental health and quality of life of Brazilian medical students: Incidence, prevalence, and associated factors within two years of follow-up | Brazil                                                                                                                        | Medical students from Brazil, recruited in medical school; Other (medical school)                                                                               | N <sub>BL</sub> = 743; N <sub>analytical</sub> sample = 312                               | 21.0 (2.6) | 64.1%        | DASS<br><br>DASS Depression scale at BL: 4.1 (3.8)<br><br>Depression (DASS Depression scale cutoff 9) at BL: 10.5%<br><br>DASS Anxiety scale at BL: 3.5 (3.3)<br><br>Anxiety (DASS Anxiety scale cutoff 7) at BL: 12.8% | WHOQOL-Bref<br><br>WHOQOL-Bref at BL:<br><ul style="list-style-type: none"> <li>physical: 3.5 (0.5)</li> <li>psychological: 3.0 (0.5)</li> <li>social: 3.8 (0.6)</li> <li>environmental: 3.5 (0.5)</li> </ul> | 2 years (4 FUs, in the middle of the semester)         | Fair |
| Ormel (1999)    | Onset of disability in depressed and non-depressed primary care patients                                                                     | Cross-national (Turkey, India, Germany, Netherlands, Nigeria, United Kingdom, France, United States of America, China, Italy) | Adult primary care attendees without disability (i.e. reduced QoL) at BL; WHO Collaborative Study on Psychological Problems in General Health Care; Health care | N <sub>BL</sub> = 3,839; N <sub>FU2</sub> = 2,089; N <sub>analytical</sub> sample = 1,051 | 15-65      | not reported | CIDI (ICD-10 depression, F32/F33)<br><br>Depression at BL: 14%                                                                                                                                                          | MOS SF 6-item Physical functioning scale<br><br>MOS SF 6-item Physical functioning at BL: 3.1 (3.3)                                                                                                           | 1 year (2 FUs, one at 3 and one at 12 months after BL) | Fair |
| Pakpour (2018)  | Predictors of oral health-related quality of life in Iranian                                                                                 | Iran                                                                                                                          | Adolescents from Iran, recruited in school; School                                                                                                              | N <sub>BL</sub> = 1,529; N <sub>analytical</sub> sample = 1,052                           | 15.1 (2.1) | 54.6%        | MDAS<br><br>MDAS at BL: 14.7 (5.4)                                                                                                                                                                                      | PedsQL 4.0<br><br>PedsQL 4.0 at BL:<br><ul style="list-style-type: none"> <li>general: 65.9 (18.7)</li> </ul>                                                                                                 | 18 months (1 FU)                                       | Good |

# Appendix. Descriptive table and forest plots for meta-analyses of SF MCS and PCS scores

|                  |                                                                                                                                            |                          |                                                                                                               |                                                            |                 |       |                                                               |                                                                                                                                                                                                                                                      |                               |      |
|------------------|--------------------------------------------------------------------------------------------------------------------------------------------|--------------------------|---------------------------------------------------------------------------------------------------------------|------------------------------------------------------------|-----------------|-------|---------------------------------------------------------------|------------------------------------------------------------------------------------------------------------------------------------------------------------------------------------------------------------------------------------------------------|-------------------------------|------|
|                  | adolescents: A prospective study                                                                                                           |                          |                                                                                                               |                                                            |                 |       |                                                               | <ul style="list-style-type: none"> <li>physical: 74.5 (25.5)</li> <li>emotional: 71.1 (24.4)</li> <li>social: 51.5 (16.1)</li> <li>school: 60.4 (22.7)</li> </ul>                                                                                    |                               |      |
| Pan (2012)       | A longitudinal study of the predictors of quality of life in patients with major depressive disorder utilizing a linear mixed effect model | Taiwan                   | MD patients recruited in outpatient psychiatric clinic; Health care                                           | N <sub>BL</sub> = 104; N <sub>analytical</sub> sample = 70 | 49.1 (12.5)     | 72.1% | ICD-10 diagnosis at BL; CES-D<br><br>CES-D at BL: 37.9 (15.6) | WHOQOL-Bref-TW<br><br>WHOQOL-Bref-TW at BL: <ul style="list-style-type: none"> <li>overall: 3.2 (0.9)</li> <li>physical: 54.5 (16.0)</li> <li>psychological: 47.6 (19.2)</li> <li>social: 48.8 (17.1)</li> <li>environmental: 56.5 (14.4)</li> </ul> | On average 26.1 months (1 FU) | Fair |
| Panagioti (2018) | Effect of health literacy on the quality of life of older patients with long-term conditions: a large cohort study in UK general practice  | United Kingdom           | Older adults with at least one long-term condition recruited in general practice (CLASSIC study); Health care | N <sub>BL</sub> = 4,377; N <sub>FU</sub> = 3,390           | 74.5 (6.8), 65+ | 52.6% | MHI-5<br><br>MHI-5 at BL: 67.3 (22.4)                         | WHOQOL-Bref<br><br>WHOQOL-Bref at BL: <ul style="list-style-type: none"> <li>physical: 60.0 (22.3)</li> <li>psychological: 69.6 (17.7)</li> <li>environment: 68.4 (20.2)</li> <li>social relationships: 72.5 (16.4)</li> </ul>                       | 1 year (1 FU)                 | Fair |
| Pyne (1997)      | Preliminary longitudinal assessment of quality of life in patients                                                                         | United States of America | Patients with MD and a community comparison group without MD; several                                         | N <sub>analytical</sub> sample = 199 (among those 118      | 52.0 (13.5)     | 22.1% | SADS or SCID (DSM-III), DIS, HAM-D                            | QWB<br><br>QWB at BL: 0.7 (0.1)                                                                                                                                                                                                                      | 6 months (1 FU)               | Poor |

# Appendix. Descriptive table and forest plots for meta-analyses of SF MCS and PCS scores

|                    | with major depression                                                                                                                         |                          | settings (health care and general population)                                                                                           | patients with MD and 81 community controls)                        |             |       | HAM-D at BL: 9.1 (10.0)                                                                                                                                                                                        |                                                                                  |                                                              |      |
|--------------------|-----------------------------------------------------------------------------------------------------------------------------------------------|--------------------------|-----------------------------------------------------------------------------------------------------------------------------------------|--------------------------------------------------------------------|-------------|-------|----------------------------------------------------------------------------------------------------------------------------------------------------------------------------------------------------------------|----------------------------------------------------------------------------------|--------------------------------------------------------------|------|
| Remmerswaal (2020) | Four-year course of quality of life and obsessive-compulsive disorder                                                                         | Netherlands              | OCD patients referred to mental health care centers (NOCDA study); Health care                                                          | N <sub>analytical</sub> sample = 239                               | 37.3 (10.9) | 54%   | SCID (DSM-IV), Y-BOCS, BDI, BAI<br><br>Chronic OCD: 60.3%<br>Intermittent OCD: 9.2%<br>Remitting OCD: 30.5%<br><br>Y-BOCS: 28.8 (7.1)<br>BAI: 17.4 (11.3)<br>BDI: 15.6 (9.7)                                   | EQ-5D<br><br>EQ-5D at BL: 0.7 (0.3)                                              | 4 years (2 FUs, one at 2 and one at 4 years)                 | Fair |
| Rhebergen (2010)   | Trajectories of recovery of social and physical functioning in major depression, dysthymic disorder and double depression: a 3-year follow-up | Netherlands              | Adult general population sample (NEMESIS); General population                                                                           | N <sub>BL</sub> = 7,076;<br>N <sub>analytical</sub> sample = 4,381 | 42.0, 18-64 | 54.3% | CIDI diagnosis for MDD, Dysthymia or double depression, and comorbid anxiety disorders<br><br>Disorders at BL where remission was achieved at FU:<br>MDD: 1.4%<br>Dysthymia: 0.01%<br>Double depression: 0.01% | SF-36 (physical health summary score)<br><br>SF-36 at BL not reported            | 3 years (2 FUs, one at 1 year, and one at 3 years after BL)  | Good |
| Rozario (2006)     | Changes in the SF-12 among depressed elders six months after discharge from an inpatient geropsychiatric unit                                 | United States of America | Older adults with depression, recruited in inpatient geropsychiatric care and discharged to community setting (Service Use of Depressed | N <sub>analytical</sub> sample = 154                               | 75.7 (7.0)  | 72%   | GDS<br>GDS at time of discharge: 12.2 (6.9)                                                                                                                                                                    | SF-12 (MCS, PCS)<br><br>SF-12 at BL:<br>• MCS: 41.6 (11.7)<br>• PCS: 30.8 (11.3) | (2 FUs, one at 6 weeks, and one at 6 months after discharge) | Fair |

Appendix. Descriptive table and forest plots for meta-analyses of SF MCS and PCS scores

|                  |                                                                                                                                                                             |                                |                                                                                                                                    |                                                                               |     |                 |                                                                                                                                                                                                                                   |                                                                         |                   |      |
|------------------|-----------------------------------------------------------------------------------------------------------------------------------------------------------------------------|--------------------------------|------------------------------------------------------------------------------------------------------------------------------------|-------------------------------------------------------------------------------|-----|-----------------|-----------------------------------------------------------------------------------------------------------------------------------------------------------------------------------------------------------------------------------|-------------------------------------------------------------------------|-------------------|------|
|                  |                                                                                                                                                                             |                                | Elders after<br>Acute Care<br>Study); Health<br>care                                                                               |                                                                               |     |                 |                                                                                                                                                                                                                                   |                                                                         |                   |      |
| Rubio<br>(2014)  | Effect of first<br>episode axis I<br>disorders on<br>quality of life                                                                                                        | United<br>States of<br>America | Representative<br>sample of<br>civilian,<br>noninstitutionaliz<br>ed, adult US<br>population<br>(NESARC);<br>General<br>population | N <sub>BL</sub> =<br>43,093;<br>N <sub>analytical</sub><br>sample =<br>34,653 | 18+ | not<br>reported | AUDADIS-IV<br><br>Incident mental<br>disorder at FU:<br><ul style="list-style-type: none"> <li>• MDD:<br/>4.3%</li> <li>• GAD:<br/>3.6%</li> <li>• SAD:<br/>2.1%</li> <li>• PD:<br/>2.4%</li> <li>• SP: 6.0%</li> </ul>           | SF-12 (MCS)<br><br>SF-12 MCS at BL:<br>53.0                             | 3 years (1<br>FU) | Good |
| Rubio<br>(2013)  | Quality of life<br>following<br>remission of<br>mental<br>disorders:<br>findings from<br>the National<br>Epidemiologic<br>Survey on<br>Alcohol and<br>Related<br>Conditions | United<br>States of<br>America | Representative<br>sample of<br>civilian,<br>noninstitutionaliz<br>ed, adult US<br>population<br>(NESARC);<br>General<br>population | N <sub>BL</sub> =<br>43,093;<br>N <sub>analytical</sub><br>sample =<br>34,653 | 18+ | not<br>reported | AUDADIS-IV<br><br>Remission from<br>mental disorders at<br>FU:<br><ul style="list-style-type: none"> <li>• MDD:<br/>3.8%</li> <li>• GAD:<br/>1.6%</li> <li>• SAD:<br/>2.2%</li> <li>• PD:<br/>1.7%</li> <li>• SP: 5.5%</li> </ul> | SF-12 (MCS)<br><br>SF-12 MCS at BL not<br>reported for entire<br>sample | 3 years (1<br>FU) | Good |
| Sareen<br>(2013) | Common<br>mental<br>disorder<br>diagnosis and<br>need for<br>treatment are<br>not the same:<br>findings from<br>a population-<br>based<br>longitudinal<br>survey            | United<br>States of<br>America | Representative<br>sample of<br>civilian,<br>noninstitutionaliz<br>ed, adult US<br>population<br>(NESARC);<br>General<br>population | N <sub>BL</sub> =<br>43,093;<br>N <sub>analytical</sub><br>sample =<br>34,653 | 18+ | not<br>reported | AUDADIS-IV<br><br>Past year disorders<br>at BL:<br><ul style="list-style-type: none"> <li>• Anxiety<br/>disorder:<br/>10.0%</li> <li>• Depressi<br/>ve<br/>disorder<br/>(dysthym<br/>ia or<br/>depressio<br/>n): 5.9%</li> </ul>  | SF-12<br><br>SF-12 at BL not<br>reported                                | 3 years (1<br>FU) | Good |

## Appendix. Descriptive table and forest plots for meta-analyses of SF MCS and PCS scores

|                  |                                                                                                                                                 |                          |                                                                                                                                           |                                                                                                                                                     |                    |              |                                                                                                                               |                                                                                                                                                    |                                                            |      |
|------------------|-------------------------------------------------------------------------------------------------------------------------------------------------|--------------------------|-------------------------------------------------------------------------------------------------------------------------------------------|-----------------------------------------------------------------------------------------------------------------------------------------------------|--------------------|--------------|-------------------------------------------------------------------------------------------------------------------------------|----------------------------------------------------------------------------------------------------------------------------------------------------|------------------------------------------------------------|------|
| Shigemoto (2020) | Social cohesion and quality of life among survivors of a natural disaster                                                                       | United States of America | Residents of Galveston or Chambers Counties experiencing Hurricane Ike (Galveston Bay Recovery Study); other (hurricane survivors)        | N <sub>analytical</sub> sample = 658                                                                                                                | Not reported       | Not reported | PCL-C<br><br>PCL-C at BL: 1.6 (0.8)                                                                                           | Q-LES-Q<br><br>Q-LES-Q at BL:<br>• psychosocial: 3.4 (0.9)<br>• physical: 3.8 (0.9)                                                                | 1 year (2 FUs, one at 6 and 15 months after the disaster)  | Good |
| Sivveland (2001) | Posttraumatic growth, depression and posttraumatic stress in relation to quality of life in tsunami survivors: a longitudinal study             | Norway                   | Sample of Norwegian tourists who have survived a Tsunami; other (tsunami survivors)                                                       | N <sub>BL</sub> = 63; N <sub>analytical</sub> sample = 58                                                                                           | 40.5 (11.3)        | 55.2%        | PCL, depression subscale of the GHQ-28<br><br>GHD-depression at BL: 2.7 (4.2)<br><br>PCL at BL: 31.6 (15.1)                   | WHOQOL-Bref (full questionnaire at BL, reduced number of items at FU)<br><br>WHOQOL-Bref at BL:<br>• general QoL: 4.0 (0.9)<br>• hrqol : 3.7 (1.2) | 4 years (1 FU)                                             | Fair |
| Spijker (2004)   | Functional disability and depression in the general population. Results from the Netherlands Mental Health Survey and Incidence Study (NEMESIS) | Netherlands              | Cohort with newly originated MDE from adult general population sample (NEMESIS); General population                                       | N <sub>analytical</sub> sample = 250                                                                                                                | 41.7 (10.7), 18-64 | 66.8%        | CIDI (DSM-III-R)<br><br>MDE: 5.2%, among those 27.6% persistent cases, 72.4% recovered at FU                                  | MOS-SF-36 (role emotional, social)<br><br>MOS-SF-36 at BL:<br>• role emotional: 77.4 (37.1)<br>• social: 78.8 (21.4)                               | 3 years (2 FUs, one at 1 year and one at 3 years after BL) | Good |
| Stegenga (2012a) | The natural course and outcome of major depressive disorder in primary care: the PREDICT-NL study                                               | Netherlands              | Adult primary care cohort recruited irrespective of their reason for consulting (PREDICT-NL); subgroup with depression at BL; Health care | N <sub>BL</sub> (total sample)= 1,338; N <sub>FU</sub> (total sample)= 759; N <sub>BL</sub> (depression subgroup)= 174; N <sub>FU</sub> (depression | 51 (17)            | 63%          | CIDI (DSM-IV), PHQ-9<br><br>MDD course in sample with depression at BL: 17% chronic, 40% fluctuating course, and 43% remitted | SF-12<br><br>SF-12 at BL:<br>• MCS: 32 (9)<br>• PCS: 47 (11)                                                                                       | 3.25 years (3 FUs, one at 6, 12, and 39 months after BL)   | Fair |

# Appendix. Descriptive table and forest plots for meta-analyses of SF MCS and PCS scores

|                     |                                                                                                                                                     |                                                                               |                                                                                                                                                                    | subgroup)=<br>100                                                                                           |                          |       | PHQ-9 at BL: 10<br>(6)                                                                                                                    |                                                                                                                                                                                                                                                                                                                                                                                   |                                                                      |      |
|---------------------|-----------------------------------------------------------------------------------------------------------------------------------------------------|-------------------------------------------------------------------------------|--------------------------------------------------------------------------------------------------------------------------------------------------------------------|-------------------------------------------------------------------------------------------------------------|--------------------------|-------|-------------------------------------------------------------------------------------------------------------------------------------------|-----------------------------------------------------------------------------------------------------------------------------------------------------------------------------------------------------------------------------------------------------------------------------------------------------------------------------------------------------------------------------------|----------------------------------------------------------------------|------|
| Stegenga<br>(2012b) | Depression,<br>anxiety and<br>physical<br>function:<br>exploring the<br>strength of<br>causality                                                    | Cross-<br>national<br>(United<br>Kingdom,<br>Spain,<br>Portugal,<br>Slovenia) | Adult primary<br>care cohort<br>(PredictD);<br>Health care                                                                                                         | N <sub>BL</sub> =<br>4,757;<br>N <sub>FU2</sub> =<br>4,006;<br>N <sub>analytical</sub><br>sample =<br>3,029 | 50 (15),<br>18-75        | 67%   | CIDI (DSM-IV),<br>PHQ anxiety and<br>panic syndrome<br>modules<br><br>MDD only: 6%<br>Anxiety only: 9%<br>Comorbid MDD<br>and anxiety: 7% | SF-12 (PCS)<br><br>SF-12 PCS at BL: 43<br>(11)                                                                                                                                                                                                                                                                                                                                    | 2 years (3<br>FUs, one<br>at 6, 12,<br>and 24<br>months<br>after BL) | Good |
| Stevens<br>(2020)   | Predicting<br>health-related<br>quality of life<br>in trauma-<br>exposed male<br>veterans in<br>late midlife: a<br>20 year<br>longitudinal<br>study | Vietnam                                                                       | Community-<br>dwelling, non-<br>patient male<br>twins who both<br>served in the<br>military between<br>1965-75<br>(VETSA); other<br>setting (military<br>veterans) | N <sub>analytical</sub><br>sample =<br>775                                                                  | 37.9 (2.5)               | 0%    | VETR-PTSD<br><br>Not reported                                                                                                             | SF-36<br><br>SF-36 at FU1:<br><ul style="list-style-type: none"> <li>• bodily pain: 9.0 (2.3)</li> <li>• general health: 18.8 (4.2)</li> <li>• physical functioning: 26.5 (4.0)</li> <li>• role physical: 7.2 (1.4)</li> <li>• role emotional: 5.6 (0.9)</li> <li>• mental health: 24.0 (4.3)</li> <li>• vitality: 16.1 (4.0)</li> <li>• social functioning: 8.8 (1.7)</li> </ul> | 20 years (2<br>FUs)                                                  | Fair |
| Tsai (2007)         | Three-year<br>follow-up<br>study of the<br>relationship<br>between<br>posttraumatic<br>stress<br>symptoms and<br>quality of life<br>among           | Taiwan                                                                        | Earthquake<br>survivors<br>recruited from an<br>earthquake-<br>affected<br>township; Other<br>(earthquake<br>survivors)                                            | N <sub>BL</sub> =<br>4,223;<br>N <sub>FU</sub> =<br>1,756                                                   | 54.5<br>(16.7),<br>16-98 | 54.4% | DRPST<br><br>PTSS: 23.8%                                                                                                                  | MOS-SF-36<br><br>MOS-SF-36 at BL:<br><ul style="list-style-type: none"> <li>• Physical: 84.5</li> <li>• Role physical: 66.9</li> <li>• Social: 86.7</li> </ul>                                                                                                                                                                                                                    | 2.5 years<br>(1 FU)                                                  | Fair |

Appendix. Descriptive table and forest plots for meta-analyses of SF MCS and PCS scores

|               |                                                                                                                                     |             |                                                                                                                                                                          |                                                                                          |                 |              |                                                                                                                                                                 |                                                                                                                                                                                                                                                      |                 |      |  |
|---------------|-------------------------------------------------------------------------------------------------------------------------------------|-------------|--------------------------------------------------------------------------------------------------------------------------------------------------------------------------|------------------------------------------------------------------------------------------|-----------------|--------------|-----------------------------------------------------------------------------------------------------------------------------------------------------------------|------------------------------------------------------------------------------------------------------------------------------------------------------------------------------------------------------------------------------------------------------|-----------------|------|--|
|               | earthquake survivors in Yu-Chi, Taiwan                                                                                              |             |                                                                                                                                                                          |                                                                                          |                 |              |                                                                                                                                                                 | <ul style="list-style-type: none"><li>• Mental health: 66.7</li><li>• Role emotional: 68.6</li><li>• General health: 58.7</li><li>• Pain: 80.6</li><li>• Vitality: 58.1</li><li>• PCS: 49.2</li><li>• MCS: 46.6</li></ul>                            |                 |      |  |
| Vulser (2018) | Depression, Cognitive Functions, and Impaired Functioning in Middle-Aged Adults From the CONSTANCES Cohort                          | France      | Population-based study of middle-aged adults (CONSTANCES Cohort); General population                                                                                     | N <sub>analytical</sub> sample = 7,426                                                   | 57.8 (7.2), 45+ | 52.2%        | CES-D<br><br>CES-D at BL: 9.9 (8.4), depressed (CES-D ≥ 19): 13.2%                                                                                              | SF-12v2<br><br>SF-12v2 at FU: <ul style="list-style-type: none"><li>• role emotional: 8.5 (1.8)</li><li>• Social: 4.1 (0.9)</li></ul>                                                                                                                | 2 years (1 FU)  | Good |  |
| Wang (2000)   | Post-earthquake quality of life and psychological well-being: longitudinal evaluation in a rural community sample in northern China | China       | Earthquake survivors recruited from an earthquake-affected township and controls recruited from unaffected village; Several settings (earthquake survivors and controls) | Earthquake survivors: N <sub>BL</sub> = 335; N <sub>FU</sub> = 263, and N = 176 controls | 39.7 (10.8)     | 53.4%        | SCL-90<br><br>SCL-90 scores at BL: <ul style="list-style-type: none"><li>• Anxiety: 1.0 (0.8)<sup>a</sup></li><li>• Depression: 0.9 (0.8)<sup>a</sup></li></ul> | WHOQOL-Bref<br><br>WHOQOL-Bref at BL: <ul style="list-style-type: none"><li>• physical: 3.5 (0.7)</li><li>• psychological: 3.3 (0.7)</li><li>• environment: 2.9 (0.5)</li><li>• social relationships: 3.8 (0.6)</li><li>• total: 3.3 (0.5)</li></ul> | 6 months (1 FU) | Fair |  |
| Wang (2017)   | Common Mental Disorder Diagnosis and Need for Treatment are Not the Same: Findings from                                             | Netherlands | Adult general population sample (NEMESIS); General population                                                                                                            | N <sub>BL</sub> = 7,076; N <sub>FU</sub> = 5,618                                         | 18-64           | not reported | CIDI (DSM-III-R)<br><br>12-month disorder at BL: <ul style="list-style-type: none"><li>• depression: 6.1%</li><li>• anxiety: 11.3%</li></ul>                    | SF-36<br><br>SF-36 at BL not reported                                                                                                                                                                                                                | 1 year (1 FU)   | Good |  |



# Appendix. Descriptive table and forest plots for meta-analyses of SF MCS and PCS scores

|           | the NEMESIS Study                                                                                              |       |                                                                                                           |                                                 |                  |       |                                                                       |                                                                       |                                       |      |
|-----------|----------------------------------------------------------------------------------------------------------------|-------|-----------------------------------------------------------------------------------------------------------|-------------------------------------------------|------------------|-------|-----------------------------------------------------------------------|-----------------------------------------------------------------------|---------------------------------------|------|
| Wu (2015) | Children in rural China enjoyed a significant increase in quality of life from 2009 to 2011                    | China | Longitudinal study of children in rural China, recruited in school; School                                | N <sub>BL</sub> = 1,047; N <sub>FU</sub> = 816  | 11.2 (2.2), 7-16 | 48.3% | CDI, SASC<br><br>CDI at BL: 11.3 (6.1)<br><br>SASC at BL: 5.6 (3.7)   | Quality of life scale<br><br>Quality of life scale at BL: 71.1 (14.6) | 2 years (1 FU)                        | Good |
| Wu (2016) | The risk and protective factors in the development of childhood social anxiety symptoms among Chinese children | China | Prospective study of Chinese children, recruited in school; School                                        | N <sub>BL</sub> = 1,047; N <sub>FU2</sub> = 816 | 11.2 (2.2)       | 48.3% | SASC<br><br>Social anxiety at BL: 15.7%<br><br>SASC at BL: 5.6 (3.7)  | Quality of life scale<br><br>Quality of life scale at BL: 71.1 (14.5) | 2 years (2 FUs, each 12 months apart) | Good |
| Wu (2017) | A prospective study of psychological resilience and depression among left-behind children in China             | China | Prospective study of children's mental health in China, left-behind children, recruited in school; School | N <sub>analytical sample</sub> = 386            | 12.2 (2.1), 8-17 | 50.3% | CDI<br><br>Depression at BL: 12.7%<br><br>Mean (SD) at BL: 11.5 (6.3) | Quality of life scale<br><br>Quality of life scale at BL: 68.9 (16.0) | 1 year (1 FU)                         | Good |

*Note.* Results were obtained directly from the publications, the study's authors or calculated from the data provided in the publications.

AgeCoDe: The German Study on Ageing, Cognition, and Dementia. AUDADIS: Alcohol Use Disorder and Associated Disabilities Interview Schedule. BDI: Beck Depression Inventory. BL: Baseline. CDI: Children's Depression Inventory. CES-D: Center for Epidemiologic Studies Depression Scale. CIDI: Composite International. Diagnostic Interview. CONSTANCES: Cohorte des consultants des Centres d'examen de santé. DASS: Depression, Anxiety and Stress Scales. DIS: Diagnostic Interview Schedule. DRPST: Disaster-Related Psychological Screening Test. DSM: Diagnostic and Statistical Manual of Mental Disorders. EQ-VAS: Visual analogue scale from EuroQuol questionnaire. FDD-DSM-IV: German short version of the Inventory to Diagnose Depression. FU: Follow-up. GAD: generalized anxiety disorder. GDS: Geriatric Depression Scale. GHQ: General Health Questionnaire. HADS: Hospital Anxiety and Depression Scales. HAM-D/HRSD17/ HDRS: Hamilton Rating Scale for Depression. ICD: International Statistical Classification of Diseases and Related Health Problems. IES: Impact of Events Scale. LIDO: Longitudinal Investigation of. Depression Outcomes study. MADRS: Montgomery and Asberg Depression Rating Scale. MCS: Mental component summary score. MDAS: Modified Dental Anxiety Scale. MHI-5: Mental Health Inventory. MINI: The Mini-International Neuropsychiatric Interview. MD: Major depression. MOS: Medical Outcomes Study. NEMESIS: The Netherlands Mental Health Survey and Incidence Study. NESARC: The National Epidemiologic Survey on Alcohol and Related Conditions. NOCDA: Netherlands Obsessive Compulsive Disorder Association. PCL: Post-traumatic disorder Checklist. PCS: Physical component summary score. PTSS: Post-traumatic stress symptoms. SASC: Social anxiety Scale for Children. SCL: Symptom Checklist. SF: Short Form Health Survey. PD: panic disorder. PHQ: Patient Health Questionnaire. PREDICT: study on prediction of depression in European general practice attendees. QLDS: Quality of Life in Depression Scale. SAD: social anxiety disorder. SADS: Schedule for Affective Disorders and Schizophrenia. SCAN: Schedules for Clinical Assessment in Neuropsychiatry. SCID: The Structured Clinical Interview. SLAS: Singapore Longitudinal Aging Study. SP: specific phobia. SWAN: Study of Women's Health Across the Nation. WHO: World Health Organization. VETSA: Vietnam Era Twin Study of Aging. WHOQOL: quality of life assessment developed by the World Health Organization Quality of Life Group. Y-BOC: Yale Brown Obsessive Compulsive Scale for Severity.

**Figure S1. Forest plot for differences in SF MCS at FU among adults with and without depressive disorders at BL**

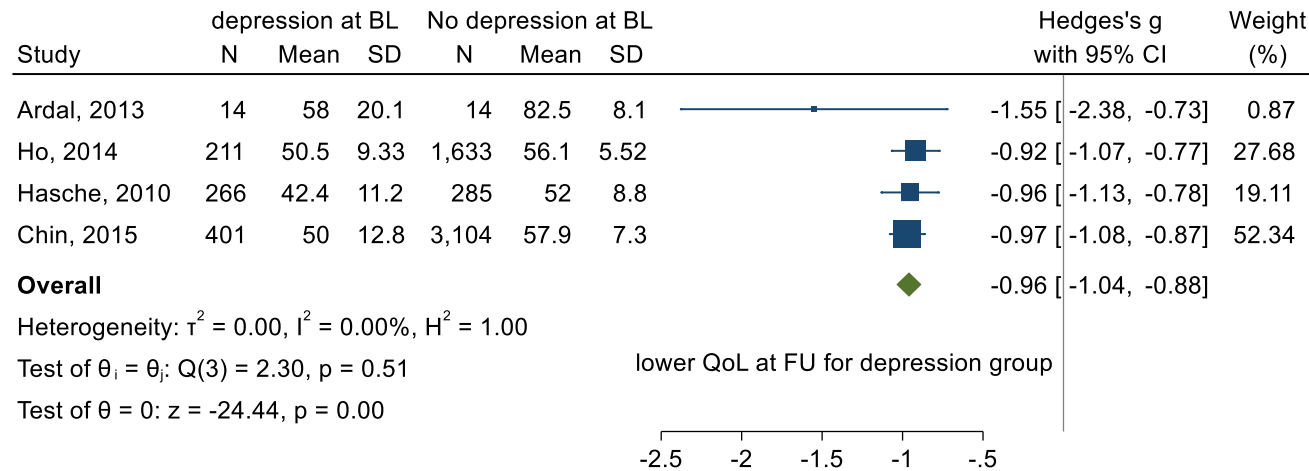

Random-effects REML model

**Figure S2. Forest plot for differences in SF PCS at FU among adults with and without depressive disorders at BL**

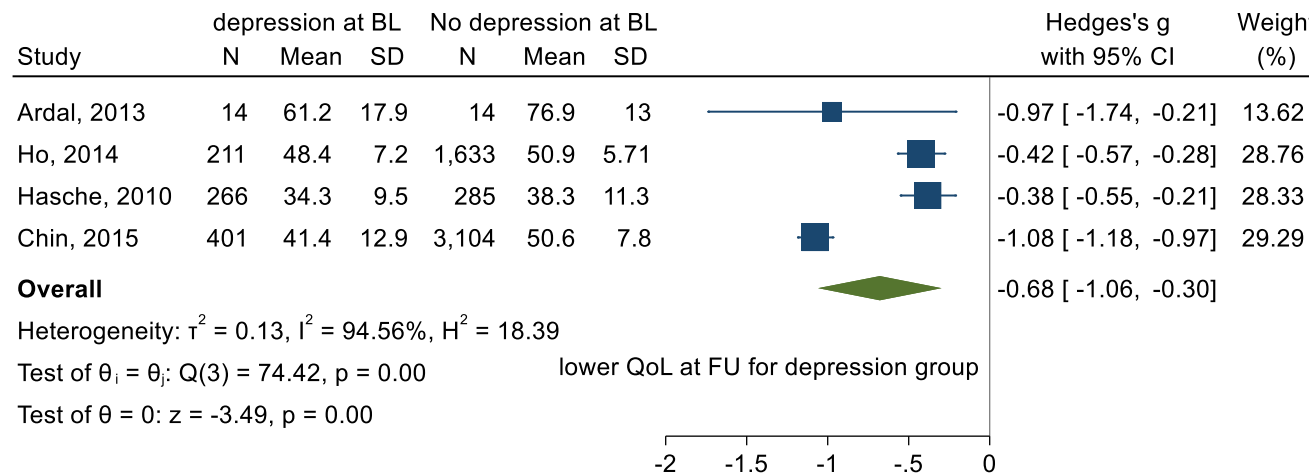

Random-effects REML model

# Appendix. Descriptive table and forest plots for meta-analyses of SF MCS and PCS scores

Figure S3. Forest plot for differences in SF MCS at FU among adults with and without depressive disorders at BL (sensitivity analysis)

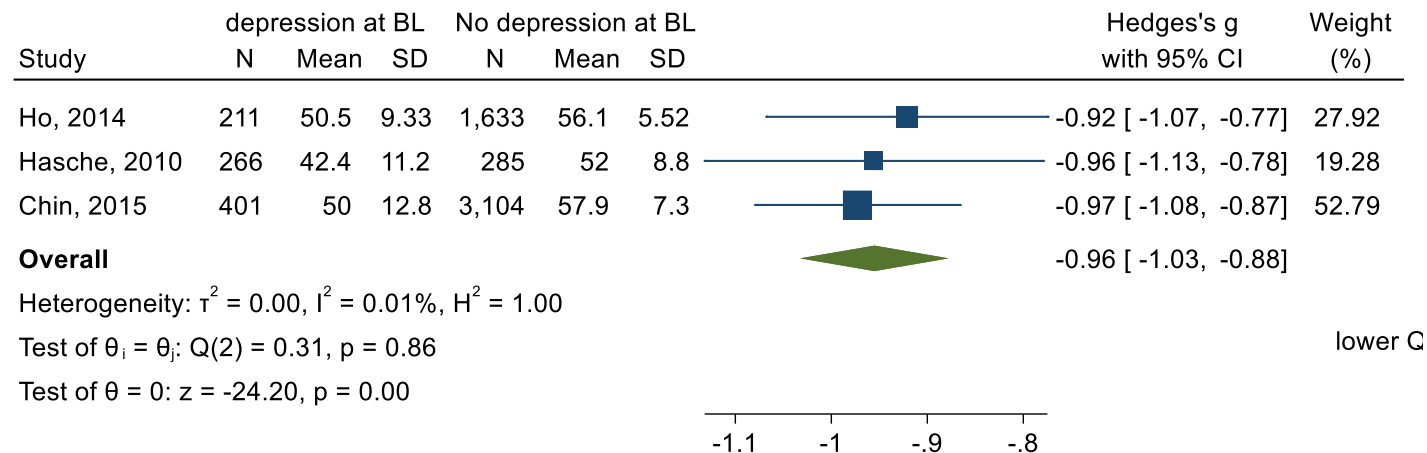

Random-effects REML model

Figure S4. Forest plot for differences in SF PCS at FU among adults with and without depressive disorders at BL (sensitivity analysis)

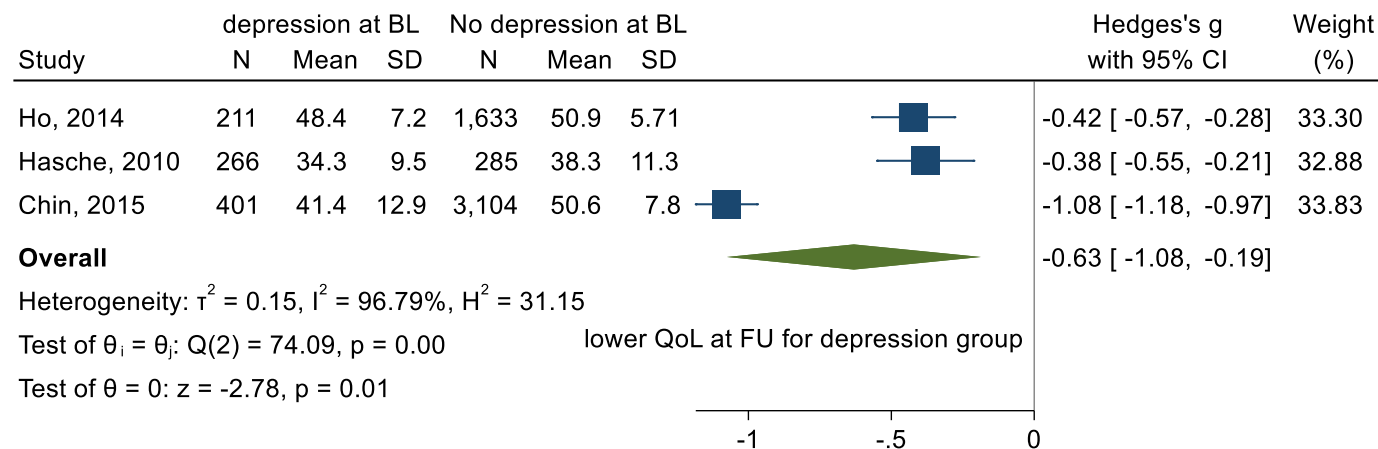

Random-effects REML model

Figure S5. Forest plot for BL differences in SF MCS among adults with MD at BL with and without remitting courses over time

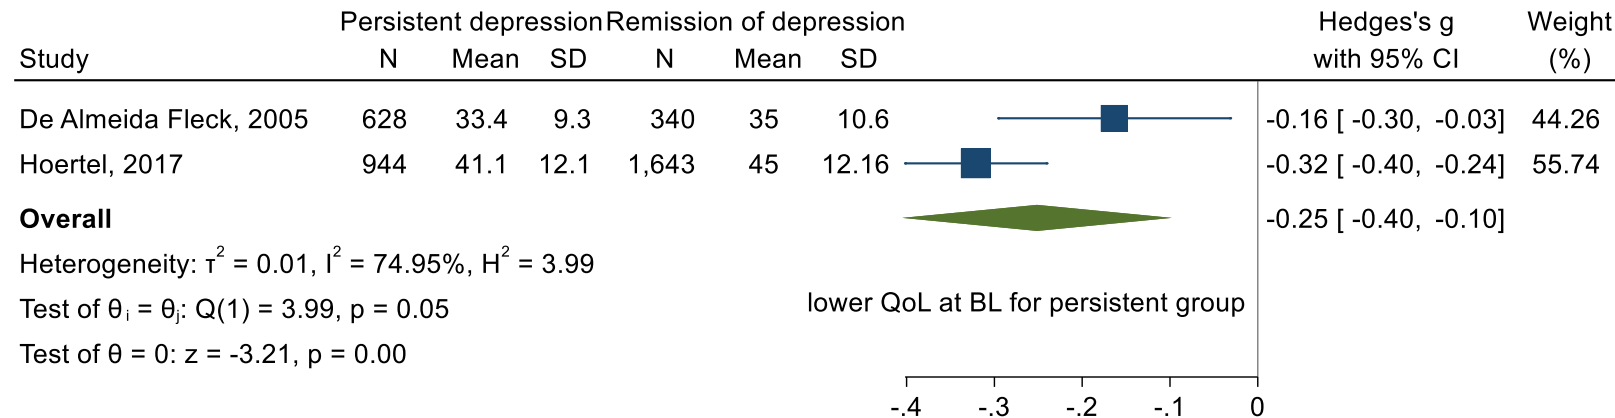

Random-effects REML model

Figure S6. Forest plot for BL differences in SF PCS among adults with MD at BL with and without remitting courses over time

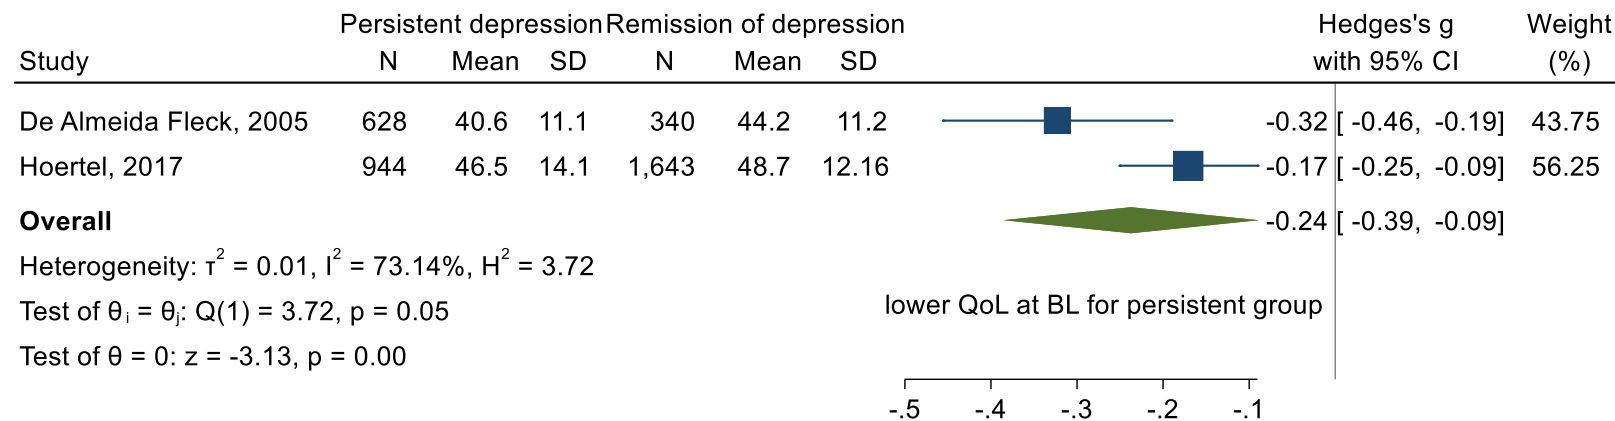

Random-effects REML model

Figure S7. Forest plot for FU differences in SF MCS among adults with depressive disorders at BL with and without remitting courses

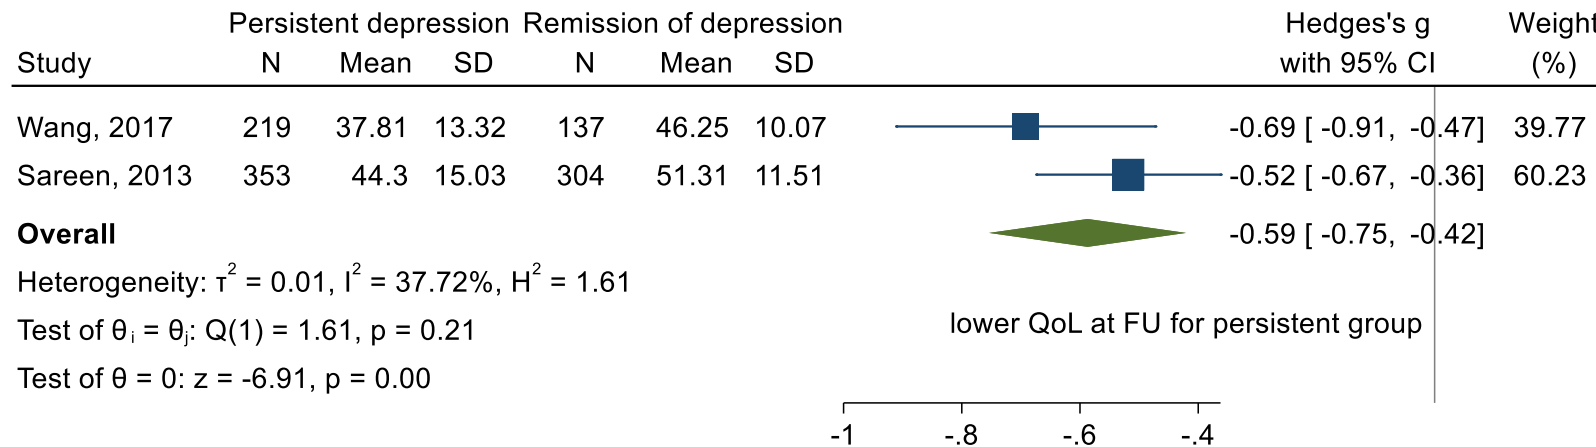

Random-effects REML model

Figure S8. Forest plot for FU differences in SF PCS among adults with depressive disorders at BL with and without remitting courses

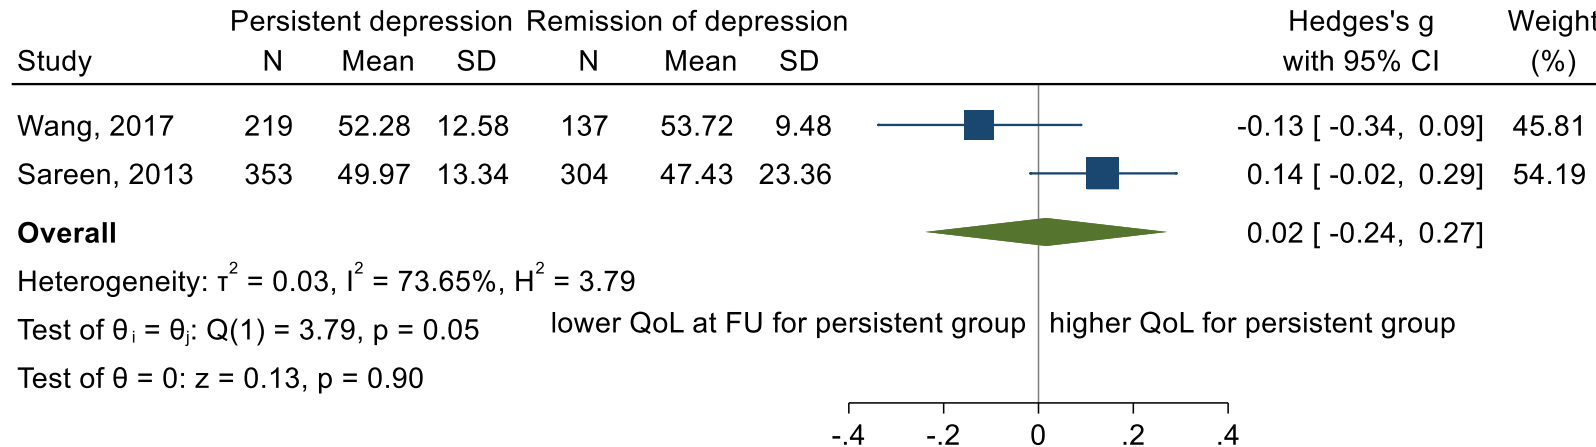

Random-effects REML model

Figure S9. Forest plot for FU differences in SF MCS among adults with anxiety disorders at BL with and without remitting courses

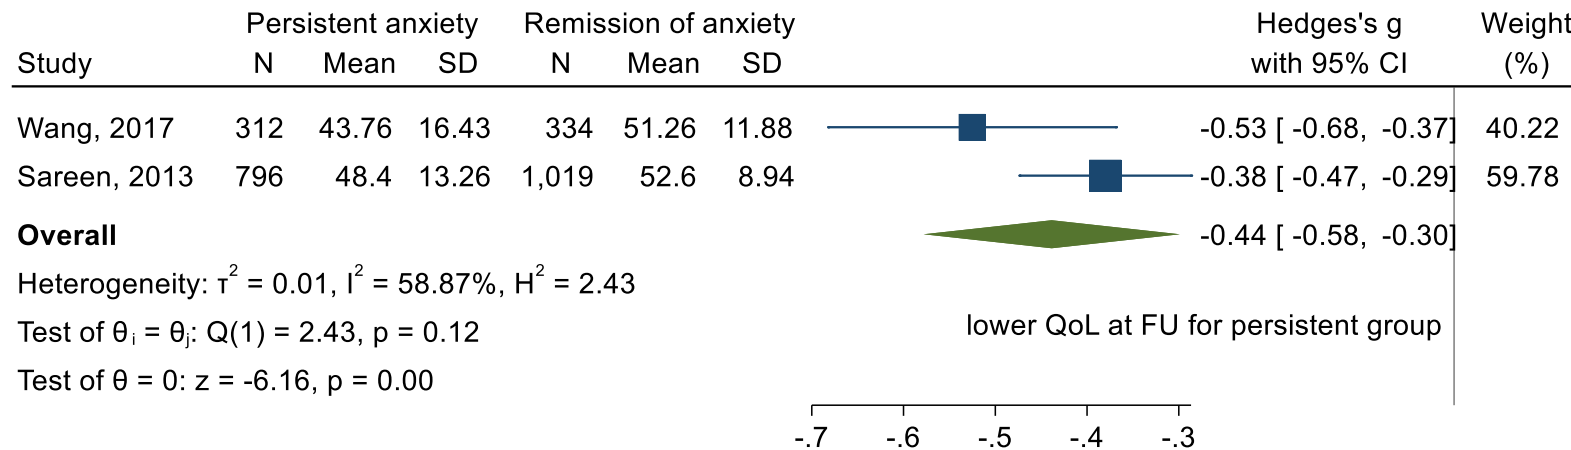

Random-effects REML model

Figure S10. Forest plot for FU differences in SF PCS among adults with anxiety disorders at BL with and without remitting courses

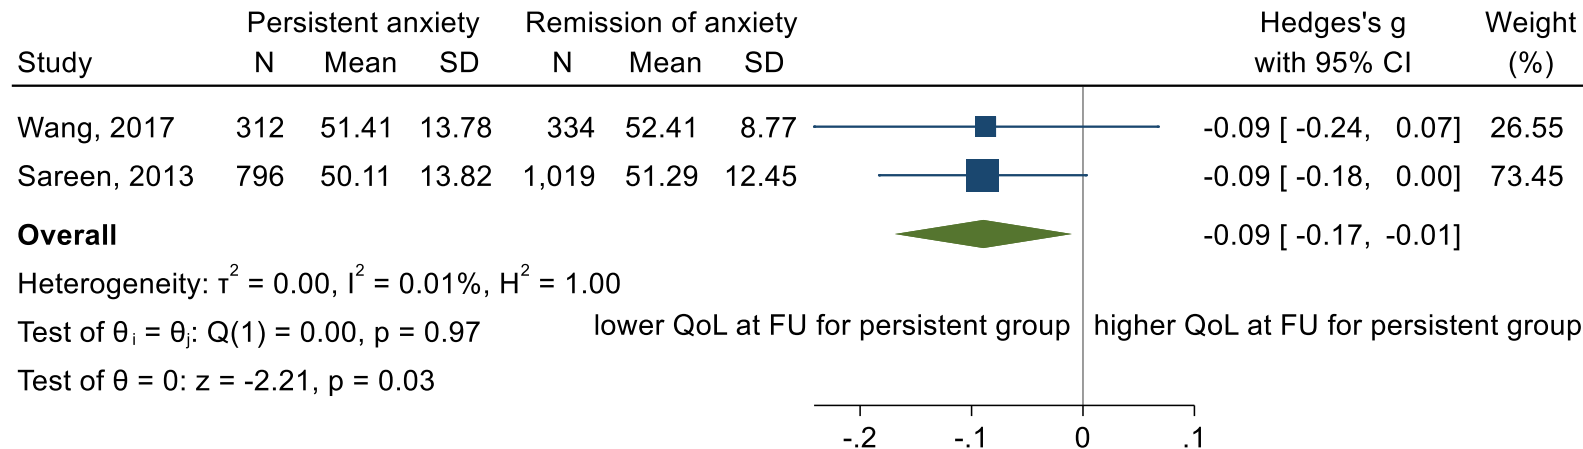

Random-effects REML model
